# Supplementary material for: Anomalous thermoelectricity of pure ZnO from 3D continuous ultrathin nanoshell structures
Source: Royal Society of Chemistry journal article supplement (doi:10.1039/c7nr08167g), 2018-01-01
Supplement: c7nr08167g1.pdf [file c7nr08167g1.pdf]

## Electronic Supplementary Information (ESI)

# Anomalous Thermoelectricity of Pure ZnO from 3D Continuous Ultrathin Nanoshell Structures

*K. Kim,<sup>a</sup> J. Park,<sup>a</sup> S. Hong,<sup>a</sup> S. H. Park,<sup>b</sup> S. G. Jeon,<sup>a</sup> C. Ahn,<sup>a</sup> J. Y. Song<sup>b,\*</sup> and S. Jeon<sup>a,\*</sup>*

*<sup>a</sup> Department of Materials Science and Engineering, Advanced Battery Center, KAIST Institute for The Nanocentury, KAIST, Daejeon 305-701, Republic of Korea.*

*<sup>b</sup> Center for Materials Genome, Korea Research Institute of Standards and Science (KRISS), Daejeon 305-340, Republic of Korea*

*\*Correspondence should be addressed to J. Y. Song (email: jysong@kriss.re.kr) and S. Jeon. (email: jeon39@kaist.ac.kr)*

## SUPPORTING FIGURES AND CAPTIONS

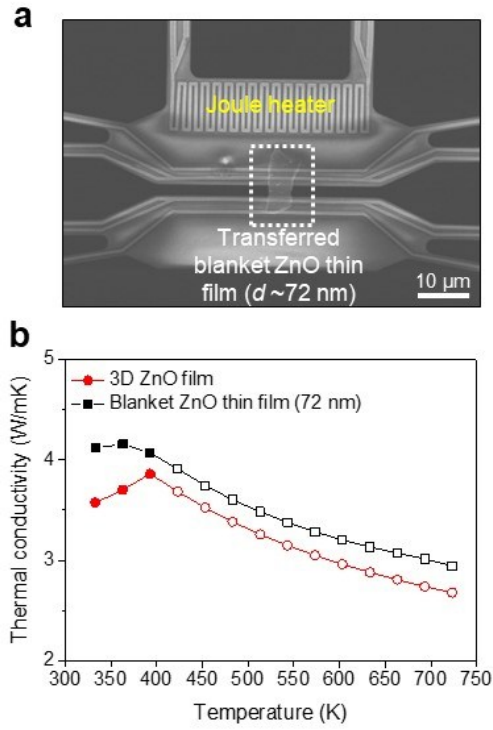

**Fig. S1** Measurement of the thermal conductivity ( $\kappa$ ) of a blanket ZnO thin film with a thickness of 72 nm. (a) SEM image of a transferred blanket ZnO thin film with a thickness of 72 nm to a microfabricated thermoelectric measurement platform (MTMP). (b) Measurement and estimation  $\kappa$  of a blanket ZnO thin film compared to that of a 3D ZnO film as a function of temperature.

## SUPPORTING TABLES AND CAPTIONS

| Process                                      | Temperature (°C) | ALD cycles (n) | DEZ pulse (sec) | Ar purge (sec) | H <sub>2</sub> O pulse (sec) | Ar purge (sec) |
|----------------------------------------------|------------------|----------------|-----------------|----------------|------------------------------|----------------|
| Blanket ZnO film (3.2 μm)                    | 150              | 12,000         | 1               | 15             | 1.5                          | 15             |
| Protecting ZnO layer on 3D templates (9 nm)  | 90               | 60             | 1               | 15             | 1.5                          | 15             |
| Additional ZnO layer on 3D templates (27 nm) | 150              | 240            | 1               | 15             | 1.5                          | 15             |
| Additional ZnO layer on 3D templates (63 nm) | 150              | 480            | 1               | 15             | 1.5                          | 15             |
| Additional ZnO layer on 3D templates (99 nm) | 150              | 720            | 1               | 15             | 1.5                          | 15             |

**Table S1** Information of ALD processes for depositing ZnO layers with different thicknesses on a bare-sapphire substrate and 3D epoxy templates.

| Preparation method                  | Product form                                                            | Power factor near RT (mW/mK <sup>2</sup> ) | Peak Power factor (mW/mK <sup>2</sup> ) | $\kappa$ near RT (W/mK) | Lowest $\kappa$ (W/mK) | $zT$ near RT        | Peak $zT$      |
|-------------------------------------|-------------------------------------------------------------------------|--------------------------------------------|-----------------------------------------|-------------------------|------------------------|---------------------|----------------|
| Pressing & sintering <sup>1</sup>   | Bulk (15 mm thick)                                                      | 0.00306 @ 300 K                            | -1.5 @ 1273K                            | -49 @ 300 K             | -5 @ 1273K             | 0.000062588 @ 300 K | -0.02 @ 1000 K |
| Spark plasma sintering <sup>2</sup> | Bulk (12 mm thick)                                                      | 0.00077 @ 300 K                            | -0.036 @ 1200K                          | -15.5 @ 473 K           | -7 @ 1200K             | -0.00002256 @ 473 K | 0.2 @ 1173 K   |
| Pressing & sintering <sup>3</sup>   | Bulk (10 mm thick)                                                      | 0.02256 @ 350 K                            | 0.1 @ 1000K                             | 33 @ 350K               | -3 @ 1000K             | 0.000239 @ 350 K    | -0.02 @ 1000 K |
| Theoretical simulation <sup>4</sup> | Thin film (5376 atoms)                                                  | NA                                         | 0.2-0.3 @ 600K                          | NA                      | 1.3 @ 303 K            | NA                  | 0.2 @ 600 K    |
| ALD <sup>5</sup>                    | Thin film (100 nm thick)                                                | NA                                         | NA                                      | 1.9 @ 303 K             | NA                     | NA                  | NA             |
| ALD <sup>6</sup>                    | Thin film (130 nm thick)                                                | -0.3 @ 300 K                               | 0.576 @ 705K                            | NA                      | NA                     | NA                  | NA             |
| ALD <sup>7</sup>                    | Thin film (130 nm thick)                                                | 0.14 @ 300 K                               | NA                                      | NA                      | NA                     | NA                  | NA             |
| ALD <sup>8</sup>                    | Superlattice thin film (100 nm film-thick)                              | 0.018 @ 300 K                              | NA                                      | NA                      | NA                     | NA                  | NA             |
| Sputtering <sup>9</sup>             | Thin film (250 nm thick)                                                | 0.0001 @ 325 K                             | 0.0002 @ 500K                           | NA                      | NA                     | NA                  | NA             |
| Sol-gel process <sup>10</sup>       | Thin film (unknown thickness)                                           | -0.00196 @ 320 K                           | 0.00239 @ 470K                          | NA                      | NA                     | NA                  | NA             |
| ALD (This Work)                     | Thick film (3.2 $\mu$ m thick)                                          | 0.188 @ 333 K                              | 0.302 @ 693 K                           | 135.48 @ 333 K          | 72.86 @ 723 K          | 0.00047 @ 333 K     | 0.0029 @ 723 K |
| ALD (This Work)                     | 3D Nanostructured thick film (72 nm shell-thick, 10 $\mu$ m film-thick) | 0.183 @ 333 K                              | 0.292 @ 693K                            | 3.57 @ 333 K            | 2.74 @ 693 K           | 0.0172 @ 333 K      | 0.072 @ 693 K  |

**Table S2** Comparison of the thermoelectric performance achieved by this work with previously reported results using pure ZnO.<sup>1-10</sup>

|                 | 3D ZnO | Blanket ZnO (3.2 $\mu\text{m}$ ) | Blanket ZnO (72 nm) |
|-----------------|--------|----------------------------------|---------------------|
| $\kappa$ (W/mK) | 3.6    | 135.5                            | 4.1                 |
| $\sigma$ (S/m)  | 3740   | 2960                             | 6300                |
| $zT$            | 0.0172 | $\sim 0.0005$                    | $\sim 0.02$         |

**Table S3.** Measured thermoelectric properties of 3D ZnO, Blanket ZnO (3.2  $\mu\text{m}$ ) and Blanket ZnO (72 nm) at 333K

## SUPPORTING REFERENCES

- [S1] T. Tsubota, M. Ohtaki, K. Eguchi and H. Arai, *J. Mater. Chem.*, 1997, **7**, 85-90.
- [S2] K. H. Kim, S. H. Shim, K. B. Shim, K. Niihara and J. Hojo, *J. Am. Ceram. Soc.*, 2005, **88**, 628-632.
- [S3] E. Guilmeau, P. Díaz-Chao, O. I. Lebedev, A. Rečnik, M. C. Schäfer, F. Delorme, F. Giovannelli, M. Košir and S. Bernik, *Inorg. Chem.*, 2016, **56**, 480-487.
- [S4] A. Roy, Y.-T. Cheng and M. L. Falk, *J. Phys. Chem. C*, 2016, **120**, 2529-2535.
- [S5] M. Ruoho, K. Valset, T. Finstad and I. Tittonen, *Nanotechnology*, 2015, **26**, 195706.
- [S6] H. Kim, Z. Wang, M. N. Hedhili, N. Wehbe and H. N. Alshareef, *Chem. Mater.*, 2017, **29**, 2794-2802.
- [S7] M. Ruoho, V. Pale, M. Erdmanis and I. Tittonen, *Appl. Phys. Lett.*, 2013, 103, 203903.
- [S8] T. Tynell, I. Terasaki, H. Yamauchi and M. Karppinen, *J. Mater. Chem. A*, 2013, **1**, 13619-13624.
- [S9] J. H. Kim, D. K. Seo, C. H. Ahn, S. W. Shin, H. H. Cho and H. K. Cho, *J. Mater. Chem.*, 2012, **22**, 16312-16317.
- [S10] M.-H. Hong, C.-S. Park, W.-S. Seo, Y. S. Lim, J.-K. Lee and H.-H. Park, *J. Nanomater.*, 2013, 1.
